# Supplementary material for: Tunable thermal diffusivity of silk protein assemblies based on their structural control and photo-induced chemical cross-linking
Source: Royal Society of Chemistry journal article supplement (doi:10.1039/d3ra06473e), 2024-01-01
Supplement: d3ra06473e1.pdf [file d3ra06473e1.pdf]

## Supplementary information

### **Tunable thermal diffusivity of silk protein assemblies based on their control of structures and photo-induced chemical cross-linking**

Michihiro Tanaka,<sup>a</sup> Toshiki Sawada,<sup>\*a</sup> Keiji Numata,<sup>b,c</sup> and Takeshi Serizawa<sup>\*a</sup>

<sup>a</sup> Department of Chemical Science and Engineering, School of Materials and Chemical Technology, Tokyo Institute of Technology, 2-12-1 Ookayama, Meguro-ku, Tokyo 152-8550, Japan

<sup>b</sup> Department of Material Chemistry, Graduate School of Engineering, Kyoto University, Kyoto-Daigaku-Katsura, Nishikyo-ku, Kyoto 615-8510, Japan

<sup>c</sup> Biomacromolecules Research Team, RIKEN Center for Sustainable Resource Science, 2-1 Hirosawa, Wako-shi, Saitama 351-0198, Japan

T. Sawada: Fax: +81-3-5734-3549; E-mail: sawada@mac.titech.ac.jp

T. Serizawa: Fax: +81-3-5734-2128; E-mail: serizawa@mac.titech.ac.jp

**Materials.** All other reagents were purchased from Nacalai Tesque. Ultrapure water with a resistivity of more than 18.2 M $\Omega$ ·cm was supplied by a Milli-Q system (Merck Millipore) and was used for all experiments.

**Silk fibroin (SF) sample preparation** Degummed *B. mori* silk fibers and films were prepared by a procedure described previously.<sup>1</sup> Silk cocoons were first cut into pieces, boiled in 0.02 M Na<sub>2</sub>CO<sub>3</sub> for 30 min and washed with ultrapure water to remove sericin. Degummed fibers were obtained after drying. To prepare the silk film, the dried silk fibers were dissolved in a 9.3 M LiBr solution at 60 °C for 4 h. Then the silk solution was dialyzed against water, which was followed by casting on a plastic Petri dish. After drying, a silk film was obtained. The silk film was further immersed into a mixed solution of methanol and ultrapure water (1/1, vol). The immersed film was subsequent stretching with different elongation ratios (10%, 20%, and 30%) using a manual uniaxial stretching machine, and dried in an ambient atmosphere, or subsequent irradiation of UV light (365 nm, HLK-3AAA-1w-365nm, HOLKIN) as necessary.

**Polarized optical microscopy (POM) observation** SF films were mounted onto the stage of a polarized optical microscope (Eclipse LV100ND, Nikon). Then, the samples were observed at ambient temperature. Images with a sample rotation of 45° were recorded to identify the oriented structures.

**Attenuated total reflection/Fourier transform infrared (ATR/FT-IR) absorption spectroscopy** To record the ATR/FT-IR spectra of the emulsions, the SF films were deposited on a gold substrate several times and dried under vacuum conditions. The IR absorption spectra of the samples were measured using a JASCO FT/IR-4100 spectrometer with a cumulative number of 100 and a resolution of 2.0 cm<sup>-1</sup> under ambient conditions.

**Thermal diffusivity measurements** Thermal diffusivity of the SF films in the thickness direction was measured using an ai-Phase mobile 1u system (ai-Phase Co. Ltd. Tokyo, Japan) based on temperature wave analysis methods.<sup>2</sup> The thermal diffusivity ( $\alpha$ ) of a film with a thickness of  $d$  was calculated from the relationship of the square root of the angular frequency ( $\sqrt{\omega}$ ) and the phase delay ( $\Delta\theta$ ) of the temperature wave as shown in the following equation:

$$\Delta\theta = -\sqrt{\frac{\omega}{2\alpha}}d - \frac{\pi}{4}$$

**Fluorescence spectroscopy measurements.** The SF films were recolonized in 1,1,1,3,3,3-hexafluoro-2-propanol. The fluorescence spectra of the solution excited at 275 nm were recorded with a fluorescence spectrophotometer (FP-6500, Jasco).

**Absorbance measurements.** The spectra of SF films were recorded with an ultraviolet-visible spectrophotometer (V-760, Jasco). The spectra were normalized at 360 nm.

**Scanning electron microscopy (SEM) observation** M13 phage membranes were dry for 1 day in a dried chamber. The samples were mounted on substrates using carbon tape and then coated with osmium. The surface of the membrane was observed by field-emission scanning electron microscopy (JSM-500F, JEOL) at an accelerating voltage of 3 kV.

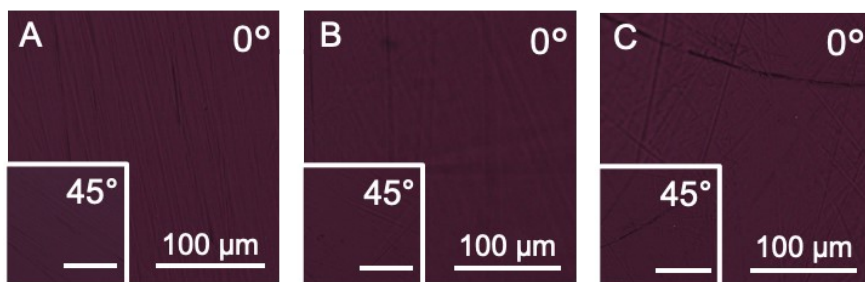

**Fig. S1** Polarized optical microscopy (POM) image of the SF films at the (A) periphery, (B) midpoint, and (C) center.

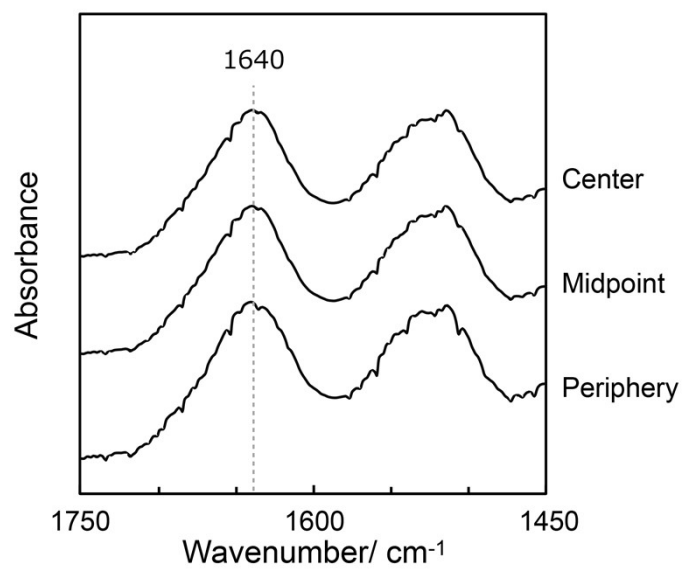

**Fig. S2** Attenuated total reflection Fourier transform infrared (ATR/FT-IR) spectroscopy of the SF films at the various position.

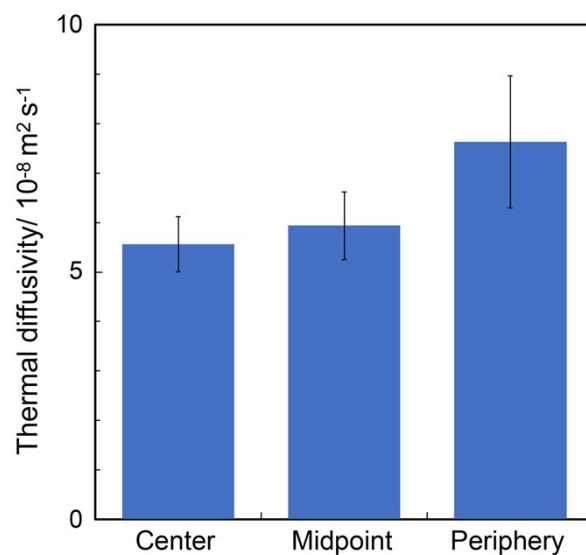

**Fig. S3** Comparison of the thermal diffusivity values of the original SF film at the center, midpoint, and periphery.

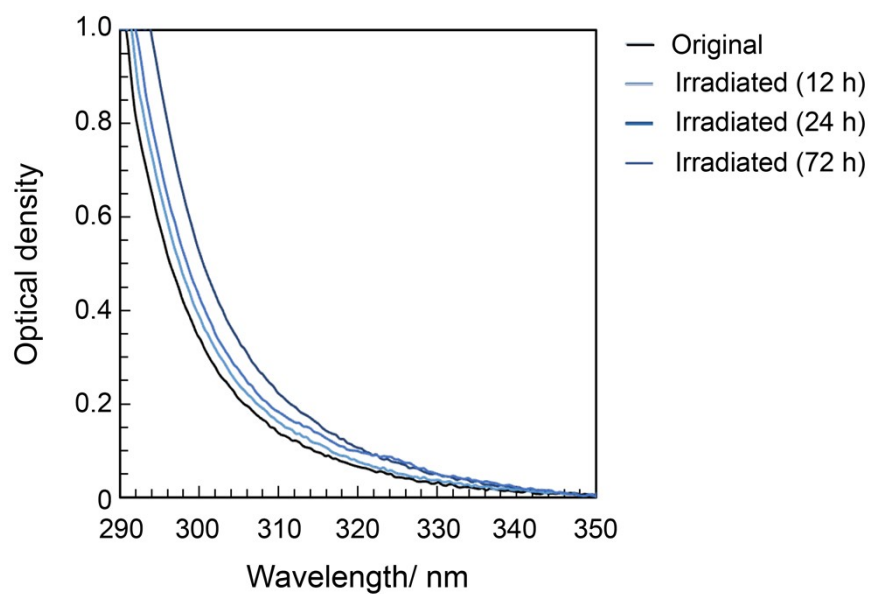

**Fig. S4** Absorbance spectra of the original and irradiated SF films.

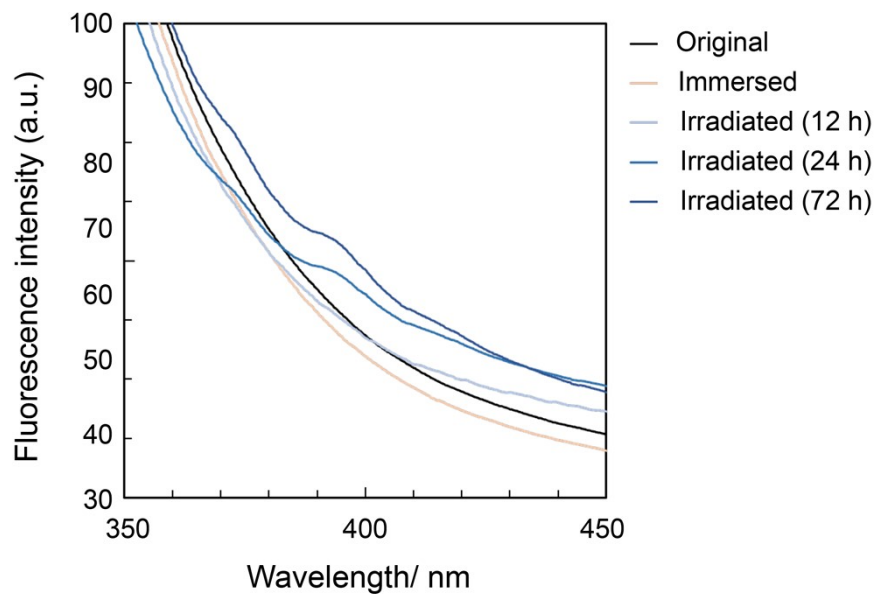

**Fig. S5** Fluorescence spectra of the resolubilized original, immersed, and irradiated SF films in 1,1,1,3,3,3-hexafluoro-2-propanol.

## References

1. D. N. Rockwood, R. C. Preda, T. Yucel, X. Q. Wang, M. L. Lovett and D. L. Kaplan, *Nat. Protoc.*, 2011, **6**, 1612-1631.
2. J. Morikawa and T. Hashimoto, *J. Appl. Phys.*, 2009, **105**, 113506.
